# Supplementary material for: The Role of Mucin Expression in the Diagnosis of Oesophago-Gastric Cancer: A Systematic Literature Review
Source: MDPI journal article supplement (doi:10.3390/cancers15215252), 2023-11-01
Supplement: s1 [file s1]

| Author            | Year | Total score | Author                | Year | Total score | Author            | Year | Total score |
|-------------------|------|-------------|-----------------------|------|-------------|-------------------|------|-------------|
| Aihara et al.     | 2005 | 3           | Han et al             | 2009 | 6           | Song et al        | 2021 | 8           |
| Ando et al.       | 2009 | 3           | He et al              | 2017 | 5           | Sugai et al       | 2004 | 8           |
| Babu et al.       | 2006 | 3           | Javanbakht et al      | 2017 | 6           | Sun et al         | 2016 | 8           |
| Benjamin et al    | 2010 | 4           | Jia et al             | 2010 | 6           | Tajima et al      | 2007 | 5           |
| Boltin et al      | 2014 | 6           | Kageyama-Yahara et al | 2014 | 6           | Tamura et al      | 2012 | 8           |
| Burjonrappa et al | 2007 | 4           | Khor et al            | 2020 | 6           | Tsukashita et al  | 2001 | 6           |
| Butt et al        | 2017 | 1           | Lee et al             | 2007 | 6           | Wang et al        | 2003 | 8           |
| Chaves et al      | 2005 | 6           | Leteurtre et al       | 2006 | 8           | Wang et al        | 2015 | 8           |
| Cheah et al       | 1994 | 1           | Li et al              | 2015 | 8           | Xiong et al       | 2017 | 8           |
| Chlumska et al    | 2018 | 3           | Li et al              | 2008 | 8           | Yamada et al      | 2020 | 8           |
| Cho et al         | 1991 | 3           | Machado et al         | 2000 | 5           | Endo et al        | 1998 | 5           |
| Choi et al        | 2009 | 5           | Mall et al            | 2000 | 5           | Higuchi et al     | 2005 | 7           |
| Conze et al       | 2010 | 4           | Mylylkangas et al     | 2008 | 5           | Yu et al          | 2016 | 8           |
| Cui et al         | 2015 | 4           | Nakajima et al        | 2003 | 6           | Tian et al        | 2012 | 8           |
| Cui et al         | 2021 | 5           | Ozcan et al           | 2018 | 5           | Setia et al       | 2016 | 7           |
| DiMaio et al      | 2012 | 5           | Palmer et al          | 2012 | 5           | Gurbuz et al      | 2004 | 8           |
| Flucke et al      | 2003 | 6           | Piessen et al         | 2007 | 4           | Wang et al        | 2000 | 8           |
| Forné et al       | 2009 | 6           | Pinto de Sousa et al  | 2004 | 8           | Semino-Mora et al | 2003 | 8           |
| Fujita et al      | 2020 | 4           | Puyan et al           | 2011 | 6           | Fan et al         | 2009 | 8           |
| Guillem et al     | 2000 | 6           | Reis et al            | 1998 | 8           | Buisine et al     | 1998 | 1           |
| Guner et al       | 2018 | 6           | Sakamoto et al        | 1997 | 8           | Weimann et al     | 2010 | 1           |
| Gurbuz et al      | 2002 | 5           | Shi et al             | 2021 | 8           | Takami et al      | 2012 | 6           |

| Author              | Year | Total score | Author               | Year | Total score | Author          | Year | Total score |
|---------------------|------|-------------|----------------------|------|-------------|-----------------|------|-------------|
| Begnami et al       | 2011 | 1           | Baldus et al         | 2002 | 7           | Lee et al       | 2008 | 6           |
| Ushiku et al        | 2013 | 7           | Baldus et al         | 1998 | 7           | Lee et al       | 2001 | 8           |
| Choi et al          | 2009 | 7           | Terada et al.        | 2013 | 7           | Kim et al       | 2013 | 6           |
| Szachnowicz et al   | 2008 | 7           | Udhayakumar et al    | 2007 | 7           | Khattab et al   | 2010 | 4           |
| Zhang et al         | 2004 | 7           | Gurbuz et al         | 2004 | 7           | Davison et al   | 2014 | 6           |
| Kim et al           | 2013 | 7           | Wang et al           | 2000 | 8           | Akyürek et al   | 2001 | 6           |
| Wang et al          | 2003 | 6           | Semino-Mora et al    | 2003 | 8           | Mizoshita et al | 2003 | 6           |
| Mitsuuchi et al     | 1999 | 7           | Yonezawa et al       | 2011 | 4           | Bae et al       | 2010 | 4           |
| Kang et al          | 2012 | 8           | Tajima et al         | 2004 | 7           | Park et al      | 2015 | 8           |
| Dwertmann et al     | 2021 | 8           | Sun et al            | 2018 | 7           | Nakashima et al | 2016 | 6           |
| Gulmann et al       | 2003 | 8           | Song et al           | 2002 | 6           | Chinyama et al  | 1999 | 7           |
| Fujimoto et al      | 2017 | 8           | Shinozaki et al      | 2004 | 6           | Wakatsuki et al | 2008 | 7           |
| Ge et al            | 2020 | 7           | Shimamura et al      | 2005 | 5           | Yang et al      | 2019 | 7           |
| Ide et al           | 2012 | 7           | Shi et al            | 2013 | 6           | Piessen et al   | 2009 | 6           |
| Streppel et al      | 2012 | 7           | Retterspitz al       | 2010 | 6           | Ohno et al      | 2006 | 6           |
| Kim et al           | 2004 | 8           | Reis et al           | 1997 | 6           |                 |      |             |
| Han et al           | 2015 | 7           | Reis at al           | 2000 | 4           |                 |      |             |
| Meji´as-Luque et al | 2010 | 7           | Pinto-de-Sousa et al | 2002 | 4           |                 |      |             |
| Mesquita et al      | 2002 | 7           | Mariette et al       | 2008 | 4           |                 |      |             |
| Hwang et al         | 2012 | 7           | Lin et al            | 2019 | 8           |                 |      |             |

**Table S1: Total Newcastle-Ottawa quality assessment scores for all included studies.**
